# Supplementary material for: Theoretical Investigation of the Structural, Spectroscopic, Electronic, and Pharmacological Properties of 4-Nerolidylcathecol, an Important Bioactive Molecule
Source: Hindawi journal article supplement (doi:10.1155/2019/9627404), 2019-01-13
Supplement: f1 [file 9627404.f1.docx]

Supplementary material

**Theoretical investigation of the structural, spectroscopic, electronic and pharmacological properties of 4-nerolidylcathecol, an important bioactive molecule**

**Renyer A. Costa1*, Earle Silva A. Junior2, Jaqueline de A. Bezerra2, Josiana Moreira Mar1, Emerson S. Lima3, Maria Lucia B. Pinheiro1, Diego V.C. Mendonça1, Guilherme Braule P. Lopes1, Adjane Dalvana S. Branches1, Kelson M.T. Oliveira1*****

1Department of Chemistry, Federal University of Amazonas (DQ-UFAM), 69077-000 Manaus, AM, Brazil

2Federal Institute of Science and Technology of Amazonas (IFAM), 69020-120 Manaus, AM, Brazil

3Faculty of Pharmaceutical Sciences, Federal University of Amazonas, 69077-000 Manaus, AM, Brazil

E-Mails: renyer.costa@gmail.com, [kelsonmota@ufam.edu.br](mailto:kelsonmota@ufam.edu.br)

Table S1. Calculated geometrical parameters for 4NRC

| Parameter | B3LYP 6-311G(2d,p) | Experimental [27] |
| --- | --- | --- |
| *Bond lenght* |  |  |
| C1-C2 | 1.39 | 1.40 |
| C2-C3 | 1.39 | 1.36 |
| C3-C4 | 1.40 | 1.39 |
| C3-O1 | 1.37 | 1.39 |
| C4-C5 | 1.40 | 1.39 |
| C4-O2 | 1.36 | 1.36 |
| C5-C6 | 1.39 | 1.39 |
| C6-C1 | 1.39 | 1.37 |
| C6-C7 | 1.53 | 1.51 |
| C7-C8 | 1.52 | - |
| C8-C9 | 1.33 | - |
| C7-C10 | 1.54 | - |
| C7-C11 | 1.57 | 1.51 |
| C11-C12 | 1.54 | 1.51 |
| C12-C13 | 1.50 | 1.49 |
| C13-C14 | 1.34 | - |
| C14-C15 | 1.50 | - |
| C14-C16 | 1.51 | - |
| C16-C17 | 1.55 | - |
| C17-C18 | 1.50 | - |
| C18-C19 | 1.33 | - |
| C19-C20 | 1.51 | - |
| C19-C21 | 1.51 | - |
| *Bond Angle* |  |  |
| C1-C2-C3 | 120.21 | 119 |
| C2-C3-C4 | 119.50 | 121 |
| C2-C3-O1 | 124.77 | 123 |
| C3-C4-C5 | 119.83 | 119 |
| C3-C4-O2 | 120.67 | 124 |
| C4-C5-C6 | 121.58 | 121 |
| C5-C6-C1 | 117.58 | 118 |
| C5-C6-C7 | 120.05 | 119 |
| C1-C6-C7 | 122.35 | 122 |
| C6-C7-C8 | 107.18 | 111 |
| C9-C8-C7 | 128.35 | - |
| C7-C11-C12 | 117.69 | - |
| C11-C12-C13 | 111.14 | - |

Table S2. Selected second-order perturbation energies of 4NRC

| **Donor orbital (i)** | **Type** | **Acceptor orbital (j)** | **Type** | **(kcal/mol)** |
| --- | --- | --- | --- | --- |
| C12-C13 |  | C13-C14 |  | 4.06 |
| C12-C13 |  | C14-C16 |  | 4.12 |
| C13-H13 |  | C14-C15 |  | 7.89 |
| C14-C16 |  | C12-C13 |  | 5.13 |
| C16-H16 |  | C14-C15 |  | 4.39 |
| C17-C18 |  | C18-C19 |  | 4.11 |
| C17-C18 |  | C19-C20 |  | 4.16 |
| C18-H18 |  | C19-C21 |  | 7.88 |
| C8-H8 |  | C9-H9 |  | 5.14 |
| C9-H9 |  | C7-C8 |  | 7.77 |
| C9-H9 |  | C8-H8 |  | 5.15 |
| C15-H15 |  | C14-C16 |  | 4.28 |
| C15-H15 |  | C13-C14 |  | 4.26 |
| C19-C20 |  | C17-C18 |  | 5.14 |
| C20-H20 |  | C19-C21 |  | 4.22 |
| C21-H21 |  | C18-C19 |  | 4.10 |
| C21-H21 |  | C19-C20 |  | 4.07 |
| C21-H21 |  | C18-C19 |  | 4.08 |
| C5-C6 |  | C1-C2 |  | 19.46 |
| C1-C2 |  | C1-C6 |  | 4.24 |
| C1-C2 |  | C3-O1 |  | 4.91 |
| C1-C2 |  | C5-C6 |  | 18.92 |
| C1-C2 |  | C3-C4 |  | 20.03 |
| C1-H1 |  | C5-C6 |  | 4.62 |
| C1-H1 |  | C2-C3 |  | 4.16 |
| C4-C5 |  | C5-C6 |  | 4.28 |
| C4-C5 |  | C3-C4 |  | 4.44 |
| C5-H5 |  | C1-C6 |  | 4.38 |
| C5-H5 |  | C3-C4 |  | 4.41 |
| C2-C3 |  | C3-C4 |  | 4.91 |
| C2-H2 |  | C1-C6 |  | 4.23 |
| C3-C4 |  | C2-C3 |  | 4.55 |
| C3-C4 |  | C2-C3 |  | 4.69 |
| C3-C4 |  | C5-C6 |  | 18.77 |
| C3-C4 |  | C1-C2 |  | 21.53 |
| O2-H2 |  | C4-C5 |  | 4.82 |
| O1 | LP | C2-C3 |  | 6.05 |
| O1 | LP | C3-C4 |  | 21.98 |
| O2 | LP | C3-C4 |  | 6.37 |
| O2 | LP | C3-C4 |  | 27.47 |


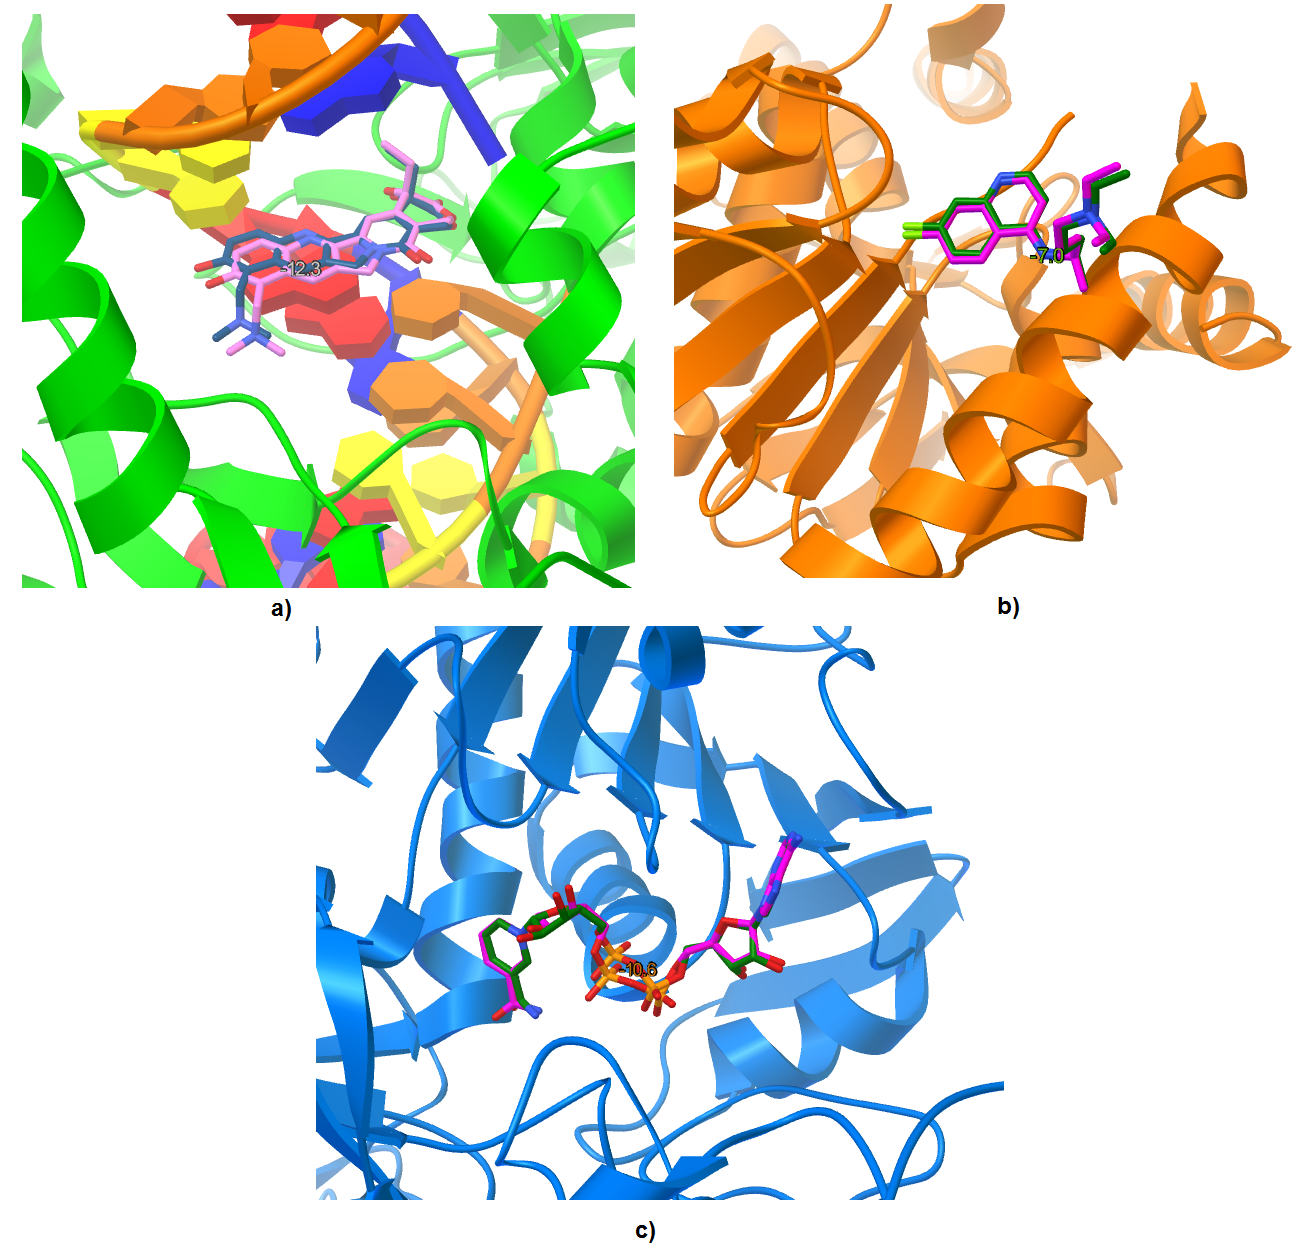


Fig S1. Validation of the docking calculations: (a) Superimposition of the docked (pink) and co-crystallized (dark blue) structures of topotecan into the DNA cleavage site of DNA topoisomerase I; (b) Superimposition of the docked (magenta) and co-crystallized (green) structures of chloroquine into the active site of *Plasmodium falciparum* lactate dehydrogenase; c) Superimposition of the docked (magenta) and co-crystallized (green) structures of NAD into the active site of GAPDH enzyme.
